# Supplementary material for: In-vitro and In-vivo effects of Cu-Melo Seed´trypsinseed´trypsin Inhibitor on Angiogenesis and Tumor Characteristics in Balb-c Mice With Breast Cancer
Source: Research Square preprint supplement (doi:10.21203/rs.3.rs-1239363/v1), 2022-01-11
Supplement: Supplementary file 1 [file 1a8ad5509b3c9f8a7fabc162.docx]

Electrophoresis analysis of purified protein

|  | **Control** | **Samples** |
| --- | --- | --- |
| **Absorbance 1** | 0.275 | 0.094 |
| **Absorbance 2** | 0.277 | 0.076 |
| **Absorbance 3** | 0.282 | 0.086 |
| **Average** | 0.278 | 0.0853 |
| **Standard deviations** | 0.006 | 0.009 |

Percent of inhibition= %70
